# Supplementary material for: Unexpected bonding similarities between the bridging metalloligands [MoCp(CO)3]− and [PtI(CO)2(PPh3)]− acting as 4-electron donors in metal clusters. Crystal structures of [Pt2Mo(μ-CO)3(μ-PPh2)Cp(PPh3)2] and [Pt3(μ-CO)2(μ-PPh2)I(PPh3)3]
Source: Royal Society of Chemistry journal article supplement (doi:10.1039/b101410m), 2001-01-01
Supplement: b101410m.doc [file b101410m.doc]

*Preparations*: **2**: A THF solution (30 mL) of Na[MoCp(CO)3] prepared by Na/Hg reduction of 36.8 mg (0.075 mmol) of [MoCp(CO)3]2 was added to 67.3 mg (0.05 mmol) of solid [Pt2(µ-H)(µ-PPh2)I2(PPh3)2] **1** and the mixture was stirred at room temperature for 1 day. The brown solution was evaporated to dryness under reduced pressure and the residue dissolved in toluene. After filtration, the solution was concentrated under reduced pressure and addition of hexane precipitated [Pt2Mo(µ-PPh2)(µ-CO)3Cp(PPh3)2], **2**,as a brown powder. Yield: 53.3 mg (79% based on Pt). Anal. Calc for C56H45O3MoP3Pt2: C, 50.00; H, 3.37. Found: C, 51.46; H, 3.51%.

**3**: this cluster was synthesized similarly to **2**, starting from 0.075 mmol [WCp(CO)3]2 and 0.05 mmol **1**. Yield: 54.7 mg, 76% based on Pt. Anal. Calcd for C56H45O3P3Pt2W: C, 46.94; H, 3.17. Found: C, 46.84; H, 3.26%.

**5**: A THF solution (15 mL, 0.35 mmol) of Na[Co(CO)4], prepared by Na/Hg reduction of 0.40 g (1.17 mmol) [Co2(CO)8] in 100 mL THF, was added to a solution of 150 mg (0.11 mmol) of **1** in 25 mL THF. The yellow solution turned rapidly green and then red. After stirring for 6 h and filtration, evaporation of the solvent afforded a red solid, which was washed with hexane and redissolved in about 70 mL THF. Addition of 70 mL hexane gave red crystals of **5**. Yield: 60 mg (45% based on Pt). Anal. Calc for C68H55IO2P4Pt3: C, 46.93; H, 3.19. Found: C, 47.31; H, 3.47%.
